# Supplementary material for: Selective extraction and quantitative analysis of pyrroloquinoline quinone from food
Source: Royal Society of Chemistry journal article supplement (doi:10.1039/d3ay01640d), 2024-01-01
Supplement: d3ay01640d1.pdf [file d3ay01640d1.pdf]

## Supplementary material

### Selective Extraction and Quantitative Analysis of Pyrroloquinoline Quinone from Food

Ke Ma, Ze-Yu Su, An-Ran Pei, Xue-Peng Yang\*

School of Tobacco Science and Engineering, Zhengzhou University of Light Industry,  
Kexuedadao Road, Zhengzhou 450008, People's Republic of China

## Content

Fig.1S Scheme of the preparation of  $\text{Fe}_3\text{O}_4@\text{SiO}_2@\text{MIPs}$ .

Fig.2S FTIR spectra of  $\text{Fe}_3\text{O}_4$  nanoparticles and  $\text{Fe}_3\text{O}_4@\text{SiO}_2@\text{MIPs}$ .

S-1 The detail method of modifying the surface of  $\text{Fe}_3\text{O}_4$ -magnetic nanoparticle.

S-2 The polymerization of PQQ and MC

Table 1S Study of  $\text{Fe}_3\text{O}_4@\text{SiO}_2@\text{MIPs}$  and  $\text{Fe}_3\text{O}_4@\text{SiO}_2@\text{NIP}$  surface area and  
porosity by the BET method

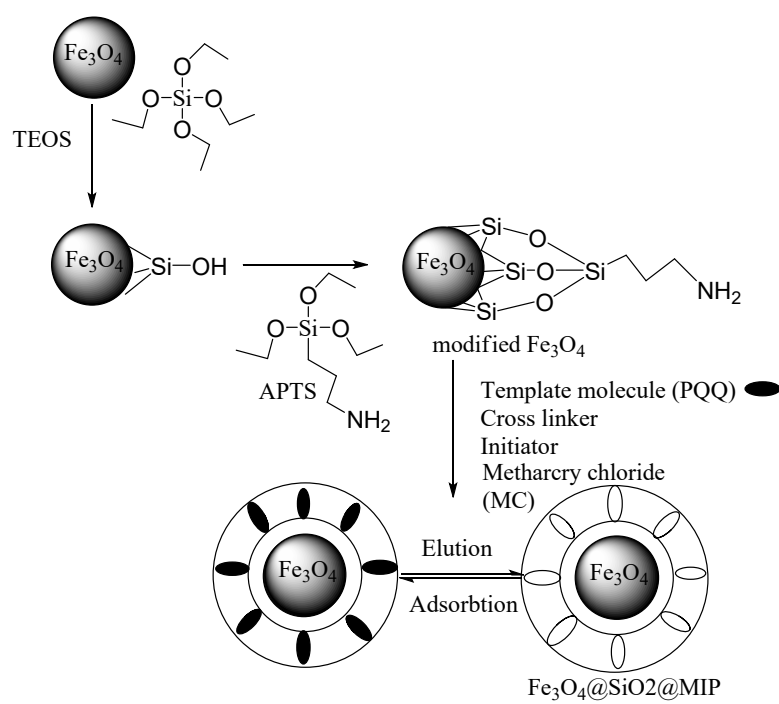

Fig.1S. Scheme of the preparation of  $\text{Fe}_3\text{O}_4@SiO_2@MIPs$ .

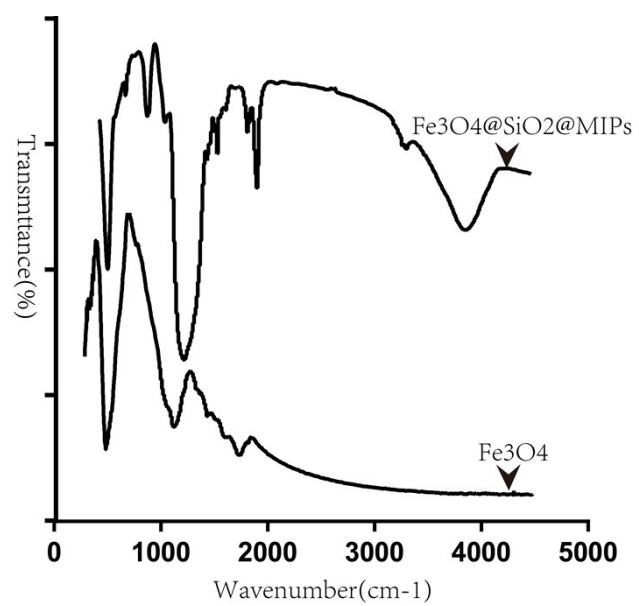

Fig. 2S FTIR spectra of  $\text{Fe}_3\text{O}_4$  nanoparticles and  $\text{Fe}_3\text{O}_4@\text{SiO}_2@\text{MIPs}$ .

*S-1 The detail method of modifying the surface of Fe<sub>3</sub>O<sub>4</sub>-magnetic nanoparticle.*

Fe<sub>3</sub>O<sub>4</sub>-magnetic nanoparticles (1.8 g) were dispersed in 200 ml ethanol using an ultrasonic oscillator. After 30 minutes, the pH of the solution was adjusted to 9.8 using ammonium hydroxide. TEOS (3.688 ml) was then added and the mixture was stirred for 12 h at 70 °C. The products were collected using an external magnetic field and then rinsed thoroughly with deionized water and ethanol until no oily suspension was detected. The obtained modified Fe<sub>3</sub>O<sub>4</sub>-magnetic nanoparticles were then modified with APTS. The modified Fe<sub>3</sub>O<sub>4</sub>-magnetic nanoparticles were dispersed in ethanol (200 ml) in a three-neck 500 ml flask using an ultrasonic oscillator, After 30 minutes, the pH was adjusted to 8 using ammonium hydroxide with constant stirring. APTS (3.688 ml) was then added and the mixture was stirred for 10 h at 80 °C.

*S-2 The polymerization of PQQ and MC*

The APTS-modified Fe<sub>3</sub>O<sub>4</sub>-magnetic nanoparticles (300 mg) were dispersed in acetonitrile in a nitrogen environment. Then, 3 ml of MC and PQQ (0.1 mmol) were added dropwise and the mixture was stirred for 12 h at 25 °C. EGDMA (2.0 mmol) and AIBN (40.0 mg) were then added and the mixture was purged by nitrogen for 10 min and placed in a thermostated water bath at 65 °C for 24 h.

Table 1S Study of Fe<sub>3</sub>O<sub>4</sub>@MIP (MMIP) and Fe<sub>3</sub>O<sub>4</sub>@NIP (MNIP) surface area and porosity by the BET method

| Material                                                 | Surface area,<br>SBET (m <sup>2</sup> /g) | Average pore<br>volume (cm <sup>3</sup> /g) | Average pore<br>diameter (nm) |
|----------------------------------------------------------|-------------------------------------------|---------------------------------------------|-------------------------------|
| Fe <sub>3</sub> O <sub>4</sub> @SiO <sub>2</sub><br>@MIP | 33.2                                      | 0.098                                       | 3                             |
| Fe <sub>3</sub> O <sub>4</sub> @SiO <sub>2</sub><br>@NIP | 9.3                                       | 0.015                                       | 7                             |
